# Supplementary material
Source: Springer Nature journal article supplement (https://www.springermedizin.de/resource/supplementary/12950_2012_282_MOESM6_ESM.pdf/9557474)

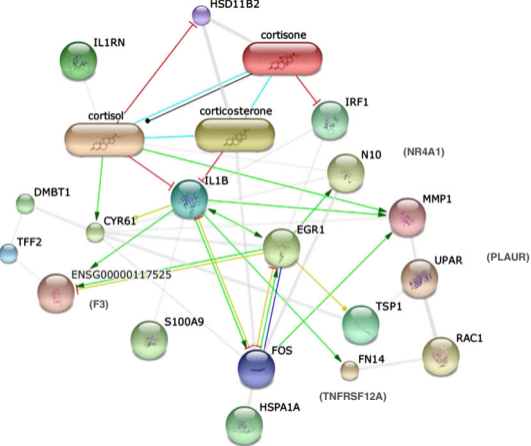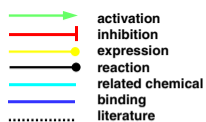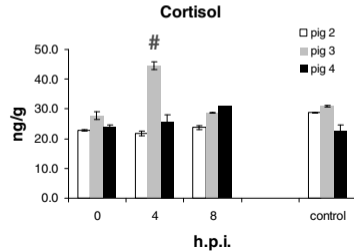

Supplement: MOESM6 [file 9557474]
